# Supplementary material for: APOE Genotypes Modulate Inflammation Independently of Their Effect on Lipid Metabolism
Source: MDPI journal article supplement (doi:10.3390/ijms232112947), 2022-10-26
Supplement: s1 [file s1]

**Supplemental Table S1.** HDL composition and fractions according to *APOE* allele in a subsample from AWHs cohort

|                                  | <b>E2 allele<sup>1</sup></b><br><b>N= 132</b>       | <b>E3 allele<sup>2</sup></b><br><b>N=813</b>        | <b>E4 allele<sup>3</sup></b><br><b>N=183</b>        | <b><i>p</i></b> |
|----------------------------------|-----------------------------------------------------|-----------------------------------------------------|-----------------------------------------------------|-----------------|
| HDL Size (nm)                    | 9.861 ± 0.211                                       | 9.860 ± 0.198                                       | 9.824 ± 0.165                                       | 0.151           |
| Cholesterol in HDL (mmol/L)      | 1.244 ± 0.309                                       | 1.251 ± 0.273                                       | 1.203 ± 0.220                                       | 0.114           |
| Triglycerides in HDL             | 0.162 ± 0.055                                       | 0.153 ± 0.047                                       | 0.155 ± 0.049                                       | 0.681           |
| Small HDL particles (mol/l)      | 4.709 x 10 <sup>-6</sup> ± 7.270 x 10 <sup>-7</sup> | 4.732 x 10 <sup>-6</sup> ± 5.314 x 10 <sup>-7</sup> | 4.714 x 10 <sup>-6</sup> ± 5.252 x 10 <sup>-7</sup> | 0.395           |
| Cholesterol in small HDL         | 0.426 ± 0.099                                       | 0.452 ± 0.079                                       | 0.453 ± 0.079                                       | 0.332           |
| Triglycerides in small HDL       | 0.059 ± 0.020                                       | 0.057 ± 0.016                                       | 0.059 ± 0.017                                       | 0.961           |
| Medium HDL particles (mol/l)     | 1.804 x 10 <sup>-6</sup> ± 4.386 x 10 <sup>-7</sup> | 1.782 x 10 <sup>-6</sup> ± 3.652 x 10 <sup>-7</sup> | 1.726 x 10 <sup>-6</sup> ± 3.160 x 10 <sup>-7</sup> | 0.067           |
| Cholesterol in medium HDL        | 0.355 ± 0.103                                       | 0.351 ± 0.088                                       | 0.336 ± 0.079                                       | 0.056           |
| Triglycerides in medium HDL      | 0.052 ± 0.017                                       | 0.050 ± 0.014                                       | 0.051 ± 0.015                                       | 0.763           |
| Large HDL particles (mol/l)      | 8.832 x 10 <sup>-7</sup> ± 4.754 x 10 <sup>-7</sup> | 8.813 x 10 <sup>-7</sup> ± 4.020 x 10 <sup>-7</sup> | 7.904 x 10 <sup>-7</sup> ± 3.173 x 10 <sup>-7</sup> | 0.087           |
| Cholesterol in large HDL         | 0.251 ± 0.155                                       | 0.246 ± 0.133                                       | 0.216 ± 0.102                                       | 0.047           |
| Triglycerides in large HDL       | 0.028 ± 0.015                                       | 0.028 ± 0.013                                       | 0.027 ± 0.012                                       | 0.783           |
| Very large HDL particles (mol/l) | 4.044 x 10 <sup>-7</sup> ± 1.553 x 10 <sup>-7</sup> | 4.009 x 10 <sup>-7</sup> ± 1.455 x 10 <sup>-7</sup> | 3.809 x 10 <sup>-7</sup> ± 1.218 x 10 <sup>-7</sup> | 0.199           |
| Cholesterol in very large HDL    | 0.204 ± 0.079                                       | 0.199 ± 0.072                                       | 0.194 ± 0.065                                       | 0.365           |
| Triglycerides in very large HDL  | 0.017 ± 0.014                                       | 0.015 ± 0.011                                       | 0.016 ± 0.011                                       | 0.819           |

Quantitative variables were expressed as mean ± standard deviation. The *p* value was adjusted by age, sex BMI. <sup>1</sup>E2 allele included subjects with E2/2 and E2/3 *APOE* genotype. <sup>2</sup>E3 allele included only subjects with E3/3 *APOE* genotype. <sup>3</sup>E4 allele included subjects with E3/4 and E4/4 *APOE* genotype.

**Supplemental Table S2.** VLDL composition and fractions according to *APOE* allele in a subsample from AWHs cohort

|                                       | <b>E2 allele<sup>1</sup></b><br><b>N= 132</b>         | <b>E3 allele<sup>2</sup></b><br><b>N=813</b>          | <b>E4 allele<sup>3</sup></b><br><b>N=183</b>          | <b><i>p</i></b> |
|---------------------------------------|-------------------------------------------------------|-------------------------------------------------------|-------------------------------------------------------|-----------------|
| VLDL Size (nm)                        | 36.91 ± 1.599                                         | 36.62 ± 1.348                                         | 36.73 ± 1.337                                         | 0.416           |
| Cholesterol in VLDL                   | 0.836 ± 0.336                                         | 0.815 ± 0.290                                         | 0.863 ± 0.304                                         | 0.491           |
| Triglycerides in VLDL                 | 1.070 ± 0.736                                         | 0.953 ± 0.609                                         | 1.023 ± 0.655                                         | 0.674           |
| Very small VLDL particle (mol/l)      | 4.333 x 10 <sup>-8</sup> ± 1.028 x 10 <sup>-8</sup>   | 4.459 x 10 <sup>-8</sup> ± 1.016 x 10 <sup>-8</sup>   | 4.610 x 10 <sup>-8</sup> ± 9.807 x 10 <sup>-9</sup>   | 0.101           |
| Cholesterol in very small VLDL        | 0.266 ± 0.064                                         | 0.277 ± 0.064                                         | 0.287 ± 0.062                                         | 0.040           |
| Triglycerides in very small VLDL      | 0.123 ± 0.042                                         | 0.119 ± 0.036                                         | 0.123 ± 0.037                                         | 0.860           |
| Small VLDL particle (mol/l)           | 3.540 x 10 <sup>-8</sup> ± 1.405 x 10 <sup>-8</sup>   | 3.384 x 10 <sup>-8</sup> ± 1.189 x 10 <sup>-8</sup>   | 3.557 x 10 <sup>-8</sup> ± 1.217 x 10 <sup>-8</sup>   | 0.863           |
| Cholesterol in small VLDL             | 0.251 ± 0.082                                         | 0.253 ± 0.075                                         | 0.267 ± 0.073                                         | 0.201           |
| Triglycerides in small VLDL           | 0.280 ± 0.139                                         | 0.258 ± 0.115                                         | 0.272 ± 0.120                                         | 0.762           |
| Medium VLDL particle (mol/l)          | 2.143 x 10 <sup>-8</sup> ± 1.396 x 10 <sup>-8</sup>   | 1.936 x 10 <sup>-8</sup> ± 1.164 x 10 <sup>-8</sup>   | 2.080 x 10 <sup>-8</sup> ± 1.251 x 10 <sup>-8</sup>   | 0.781           |
| Cholesterol in medium VLDL            | 0.206 ± 0.119                                         | 0.191 ± 0.099                                         | 0.204 ± 0.106                                         | 0.964           |
| Triglycerides in medium VLDL          | 0.368 ± 0.259                                         | 0.328 ± 0.216                                         | 0.353 ± 0.232                                         | 0.683           |
| Large VLDL particle (mol/l)           | 6.149 x 10 <sup>-9</sup> ± 5.827 x 10 <sup>-9</sup>   | 5.213 x 10 <sup>-9</sup> ± 4.873 x 10 <sup>-9</sup>   | 5.734 x 10 <sup>-9</sup> ± 5.292 x 10 <sup>-9</sup>   | 0.624           |
| Cholesterol in large VLDL             | 0.086 ± 0.079                                         | 0.073 ± 0.065                                         | 0.080 ± 0.070                                         | 0.684           |
| Triglycerides in large VLDL           | 0.206 ± 0.199                                         | 0.174 ± 0.167                                         | 0.191 ± 0.181                                         | 0.595           |
| Very large VLDL particle (mol/l)      | 9.738 x 10 <sup>-10</sup> ± 1.166 x 10 <sup>-9</sup>  | 7.738 x 10 <sup>-10</sup> ± 9.417 x 10 <sup>-10</sup> | 8.793 x 10 <sup>-10</sup> ± 1.026 x 10 <sup>-9</sup>  | 0.613           |
| Cholesterol in very large VLDL        | 0.019 ± 0.023                                         | 0.015 ± 0.018                                         | 0.017 ± 0.020                                         | 0.782           |
| Triglycerides in very large VLDL      | 0.060 ± 0.071                                         | 0.047 ± 0.058                                         | 0.054 ± 0.063                                         | 0.570           |
| Extremely large VLDL particle (mol/l) | 2.062 x 10 <sup>-10</sup> ± 2.512 x 10 <sup>-10</sup> | 1.607 x 10 <sup>-10</sup> ± 1.892 x 10 <sup>-10</sup> | 1.841 x 10 <sup>-10</sup> ± 2.028 x 10 <sup>-10</sup> | 0.647           |
| Cholesterol in extremely large VLDL   | 0.007 ± 0.008                                         | 0.006 ± 0.007                                         | 0.007 ± 0.007                                         | 0.890           |
| Triglycerides in extremely large VLDL | 0.031 ± 0.038                                         | 0.024 ± 0.029                                         | 0.028 ± 0.031                                         | 0.622           |

Quantitative variables were expressed as mean ± standard deviation. The *p* value was adjusted by age, sex BMI. <sup>1</sup>E2 allele included subjects with E2/2 and E2/3 *APOE* genotype. <sup>2</sup>E3 allele included only subjects with E3/3 *APOE* genotype. <sup>3</sup>E4 allele included subjects with E3/4 and E4/4 *APOE* genotype

**Supplemental Table S3.** LDL composition and fractions according to *APOE* genotypes in a subsample from AWHs cohort

|                            | <b>E2/E2<br/>(N=3)</b>                              | <b>E2/E3<br/>(N=129)</b>                            | <b>E3/E3<br/>(N=813)</b>                            | <b>E3/E4<br/>(N=171)</b>                            | <b>E4/E4<br/>(N=12)</b>                             | <b><i>p</i></b> |
|----------------------------|-----------------------------------------------------|-----------------------------------------------------|-----------------------------------------------------|-----------------------------------------------------|-----------------------------------------------------|-----------------|
| <b>LDL size</b>            | 23.7 ± 0.10                                         | 23.6 ± 0.083                                        | 23.5 ± 0.074                                        | 23.5 ± 0.069                                        | 23.5 ± 0.080                                        | 0.322           |
| <b>Cholesterol in LDL</b>  | 0.800 ± 0.131                                       | 1.566 ± 0.462                                       | 1.756 ± 0.486                                       | 1.859 ± 0.474                                       | 1.616 ± 0.419                                       | <b>0.006</b>    |
| <b>TG in LDL</b>           | 0.152 ± 0.028                                       | 0.186 ± 0.057                                       | 0.187 ± 0.053                                       | 0.191 ± 0.050                                       | 0.208 ± 0.056                                       | 0.304           |
| <b>Small LDL particle</b>  | 1.008 x 10 <sup>-7</sup> ± 1.531 x 10 <sup>-8</sup> | 1.650 x 10 <sup>-7</sup> ± 4.144 x 10 <sup>-8</sup> | 1.799 x 10 <sup>-7</sup> ± 4.365 x 10 <sup>-8</sup> | 1.891 x 10 <sup>-7</sup> ± 4.16 x 10 <sup>-8</sup>  | 1.734 x 10 <sup>-7</sup> ± 3.567 x 10 <sup>-8</sup> | <b>0.009</b>    |
| Cholesterol in small LDL   | 0.130 ± 0.032                                       | 0.283 ± 0.089                                       | 0.322 ± 0.092                                       | 0.341 ± 0.089                                       | 0.293 ± 0.083                                       | <b>0.005</b>    |
| TG in small VLDL           | 0.033 ± 0.009                                       | 0.033 ± 0.013                                       | 0.032 ± 0.011                                       | 0.033 ± 0.011                                       | 0.038 ± 0.013                                       | 0.388           |
| <b>Medium LDL particle</b> | 7.992 x 10 <sup>-8</sup> ± 1.212 x 10 <sup>-8</sup> | 1.401 x 10 <sup>-7</sup> ± 3.755 x 10 <sup>-8</sup> | 1.545 x 10 <sup>-7</sup> ± 3.974 x 10 <sup>-8</sup> | 1.630 x 10 <sup>-7</sup> ± 3.811 x 10 <sup>-8</sup> | 1.473 x 10 <sup>-7</sup> ± 3.261 x 10 <sup>-8</sup> | <b>0.006</b>    |
| Cholesterol in medium LDL  | 0.211 ± 0.046                                       | 0.462 ± 0.148                                       | 0.525 ± 0.154                                       | 0.559 ± 0.149                                       | 0.479 ± 0.133                                       | <b>0.005</b>    |
| TG in medium LDL           | 0.039 ± 0.006                                       | 0.050 ± 0.016                                       | 0.051 ± 0.145                                       | 0.052 ± 0.013                                       | 0.057 ± 0.015                                       | 0.133           |
| <b>Large LDL particle</b>  | 1.051 x 10 <sup>-7</sup> ± 1.209 x 10 <sup>-8</sup> | 1.740 x 10 <sup>-7</sup> ± 4.248 x 10 <sup>-8</sup> | 1.894 x 10 <sup>-7</sup> ± 4.576 x 10 <sup>-8</sup> | 1.984 x 10 <sup>-7</sup> ± 4.482 x 10 <sup>-8</sup> | 1.807 x 10 <sup>-7</sup> ± 3.871 x 10 <sup>-8</sup> | <b>0.012</b>    |
| Cholesterol in large LDL   | 0.438 ± 0.056                                       | 0.819 ± 0.228                                       | 0.909 ± 0.242                                       | 0.959 ± 0.238                                       | 0.843 ± 0.205                                       | <b>0.008</b>    |
| TG in large LDL            | 0.082 ± 0.013                                       | 0.102 ± 0.030                                       | 0.103 ± 0.028                                       | 0.105 ± 0.026                                       | 0.113 ± 0.030                                       | 0.254           |

Quantitative variables are expressed as means ± standard deviations. The *p* value was adjusted by age, sex and BMI.

**Supplemental Table S4.** HDL composition and fractions according to *APOE* genotypes in a subsample from AWHs cohort

|                                 | <b>E2/E2<br/>(N=3)</b>                              | <b>E2/E3<br/>(N=129)</b>                            | <b>E3/E3<br/>(N=813)</b>                             | <b>E3/E4<br/>(N=171)</b>                             | <b>E4/E4<br/>(N=12)</b>                             | <b><i>p</i></b> |
|---------------------------------|-----------------------------------------------------|-----------------------------------------------------|------------------------------------------------------|------------------------------------------------------|-----------------------------------------------------|-----------------|
| <b>HDL size</b>                 | 9.66±0.12                                           | 9.86±0.21                                           | 9.86±<br>0.20                                        | 9.83±0.17                                            | 9.80±0.16                                           | 0.183           |
| <b>Cholesterol in HDL</b>       | 0.96±0.18                                           | 1.25±0.31                                           | 1.25±0.27                                            | 1.21±0.22                                            | 1.18±0.23                                           | 0.163           |
| <b>TG in HDL</b>                | 0.19±0.05                                           | 0.16±0.06                                           | 0.15±0.05                                            | 0.15±0.05                                            | 0.18±0.07                                           | 0.754           |
| <b>Small HDL particle</b>       | 4.77x 10 <sup>-6</sup><br>±2.26 x 10 <sup>-7</sup>  | 4.71 x 10 <sup>-6</sup><br>±7.35 x 10 <sup>-7</sup> | 4.73 x 10 <sup>-6</sup><br>±5. x 10 <sup>-7</sup>    | 4.703 x 10 <sup>-6</sup><br>±5.34 x 10 <sup>-7</sup> | 4.90 x 10 <sup>-6</sup><br>±3.45 x 10 <sup>-7</sup> | 0.539           |
| Cholesterol in small HDL        | 0.35±0.07                                           | 0.43±0.099                                          | 0.45±0.08                                            | 0.45±0.08                                            | 0.44±0.09                                           | 0.317           |
| TG in small HDL                 | 0.07±0.02                                           | 0.06±0.02                                           | 0.06±0.016                                           | 0.06±0.016                                           | 0.07±0.02                                           | 0.936           |
| <b>Medium HDL particle</b>      | 1.70 x 10 <sup>-6</sup><br>±8.92 x 10 <sup>-8</sup> | 1.81 x 10 <sup>-6</sup><br>±4.43 x 10 <sup>-7</sup> | 1.78 x 10 <sup>-6</sup><br>±3.65 x 10 <sup>-7</sup>  | 1.72 x 10 <sup>-6</sup><br>±3.20 x 10 <sup>-7</sup>  | 1.81 x 10 <sup>-6</sup><br>±2.48 x 10 <sup>-7</sup> | 0.115           |
| Cholesterol in medium HDL       | 0.31±0.04                                           | 0.36±0.10                                           | 0.35±<br>0.09                                        | 0.34±0.08                                            | 0.35±0.06                                           | 0.093           |
| TG in medium HDL                | 0.06±0.01                                           | 0.05±0.02                                           | 0.049±0.01                                           | 0.05±0.01                                            | 0.06± 0.02                                          | 0.838           |
| <b>Large HDL particle</b>       | 4.45 x 10 <sup>-7</sup><br>±3.85 x 10 <sup>-7</sup> | 8.93 x 10 <sup>-7</sup><br>±4.74 x 10 <sup>-7</sup> | 8.81 x 10 <sup>-7</sup><br>±4.02 x 10 <sup>-7</sup>  | 7.91 x 10 <sup>-7</sup><br>±3.18 x 10 <sup>-7</sup>  | 7.74 x 10 <sup>-7</sup><br>±3.16 x 10 <sup>-7</sup> | 0.123           |
| Cholesterol in large HDL        | 0.12±0.11                                           | 0.25±0.15                                           | 0.246±0.13                                           | 0.216±0.10                                           | 0.208±0.10                                          | 0.070           |
| TG in large HDL                 | 0.02±0.01                                           | 0.028±0.01                                          | 0.028±0.01                                           | 0.027±0.01                                           | 0.031±0.014                                         | 0.746           |
| <b>Extra-large HDL particle</b> | 2.58 x 10 <sup>-7</sup><br>±3.07 x 10 <sup>-8</sup> | 4.08 x 10 <sup>-7</sup><br>±1.55 x 10 <sup>-7</sup> | 4.001 x 10 <sup>-7</sup><br>±1.46 x 10 <sup>-7</sup> | 3.83 x 10 <sup>-7</sup><br>±1.19 x10 <sup>-7</sup>   | 3.49 x 10 <sup>-7</sup><br>±1.56 x 10 <sup>-7</sup> | 0.191           |
| Cholesterol in extra-large HDL  | 0.15 ±<br>0.01                                      | 0.21 ± 0.08                                         | 0.20 ±<br>0.07                                       | 0.20 ± 0.06                                          | 0.18 ± 0.08                                         | 0.331           |
| TG in extra-large HDL           | 0.018 ±<br>0.01                                     | 0.017 ± 0.01                                        | 0.015 ±<br>0.01                                      | 0.016 ±<br>0.01                                      | 0.019 ±<br>0.015                                    | 0.805           |

Quantitative variables are expressed as means ± standard deviations. The *p* value was adjusted by age, sex and BMI.

**Supplemental Table S5.** VLDL composition and fractions according to *APOE* genotypes in a subsample from AWHs cohort

|                                        | <b>E2/E2<br/>(N=3)</b>                                | <b>E2/E3<br/>(N=129)</b>                              | <b>E3/E3<br/>(N=813)</b>                              | <b>E3/E4<br/>(N=171)</b>                              | <b>E4/E4<br/>(N=12)</b>                               | <b><i>p</i></b> |
|----------------------------------------|-------------------------------------------------------|-------------------------------------------------------|-------------------------------------------------------|-------------------------------------------------------|-------------------------------------------------------|-----------------|
| <b>VLDL size</b>                       | 38.608±1.196                                          | 36.871±1.589                                          | 36.618±1.348                                          | 36.693±1.293                                          | 37.275±1.851                                          | 0.443           |
| <b>Extra-small VLDL particle</b>       | 3.596 x 10 <sup>-8</sup><br>±4.782 x 10 <sup>-9</sup> | 4.351 x 10 <sup>-8</sup><br>±1.032 x 10 <sup>-8</sup> | 4.459 x 10 <sup>-8</sup><br>±1.016 x 10 <sup>-8</sup> | 4.613 x 10 <sup>-8</sup><br>±9.852 x 10 <sup>-9</sup> | 4.570 x 10 <sup>-8</sup><br>±9.543 x 10 <sup>-9</sup> | 0.118           |
| Cholesterol in extra-small VLDL        | 0.209 ± 0.0189                                        | 0.268 ± 0.064                                         | 0.277 ± 0.064                                         | 0.288 ± 0.062                                         | 0.2698 ± 0.059                                        | 0.059           |
| TG in extra-small VLDL                 | 0.126 ± 0.031                                         | 0.123 ± 0.042                                         | 0.119 ± 0.036                                         | 0.122 ± 0.036                                         | 0.138 ± 0.034                                         | 0.788           |
| <b>Small VLDL particle</b>             | 4.042 x 10 <sup>-8</sup> ± 1.262 x 10 <sup>-8</sup>   | 3.529 x 10 <sup>-8</sup> ± 1.410 x 10 <sup>-8</sup>   | 3.384 x 10 <sup>-8</sup> ± 1.189 x 10 <sup>-8</sup>   | 3.530 x 10 <sup>-8</sup> ± 1.199 x 10 <sup>-8</sup>   | 3.941 x 10 <sup>-8</sup> ± 1.464 x 10 <sup>-8</sup>   | 0.846           |
| Cholesterol in small VLDL              | 0.2399 ± 0.055                                        | 0.251 ± 0.083                                         | 0.253 ± 0.075                                         | 0.266 ± 0.074                                         | 0.269 ± 0.074                                         | 0.237           |
| TG in small VLDL                       | 0.354 ± 0.134                                         | 0.278 ± 0.139                                         | 0.258 ± 0.115                                         | 0.269 ± 0.117                                         | 0.320 ± 0.152                                         | 0.812           |
| <b>Medium VLDL particle</b>            | 2.913 x 10 <sup>-8</sup> ± 1.475 x 10 <sup>-8</sup>   | 2.126 x 10 <sup>-8</sup> ± 1.395 x 10 <sup>-8</sup>   | 1.936 x 10 <sup>-8</sup> ± 1.165 x 10 <sup>-8</sup>   | 2.046 x 10 <sup>-8</sup> ± 1.210 x 10 <sup>-8</sup>   | 2.568 x 10 <sup>-8</sup> ± 1.728 x 10 <sup>-8</sup>   | 0.828           |
| Cholesterol in medium VLDL             | 0.263 ± 0.121                                         | 0.205 ± 0.119                                         | 0.191 ± 0.099                                         | 0.202 ± 0.103                                         | 0.239 ± 0.143                                         | 0.942           |
| TG in medium VLDL                      | 0.519 ± 0.276                                         | 0.365 ± 0.258                                         | 0.328 ± 0.216                                         | 0.346 ± 0.224                                         | 0.448 ± 0.323                                         | 0.736           |
| <b>Large VLDL particle</b>             | 9.439 x 10 <sup>-9</sup> ± 6.063 x 10 <sup>-9</sup>   | 6.073 x 10 <sup>-9</sup> ± 5.824 x 10 <sup>-9</sup>   | 5.213 x 10 <sup>-9</sup> ± 4.873 x 10 <sup>-9</sup>   | 5.567 x 10 <sup>-9</sup> ± 5.064 x 10 <sup>-9</sup>   | 8.114 x 10 <sup>-9</sup> ± 7.772 x 10 <sup>-9</sup>   | 0.689           |
| Cholesterol in large VLDL              | 0.132 ± 0.081                                         | 0.085 ± 0.079                                         | 0.073 ± 0.065                                         | 0.078 ± 0.067                                         | 0.111 ± 0.03                                          | 0.745           |
| TG in large VLDL                       | 0.318 ± 0.208                                         | 0.203 ± 0.199                                         | 0.174 ± 0.167                                         | 0.185 ± 0.173                                         | 0.273 ± 0.267                                         | 0.660           |
| <b>Extra-large VLDL particle</b>       | 1.555 x 10 <sup>-9</sup> ± 1.119 x 10 <sup>-9</sup>   | 9.603 x 10 <sup>-10</sup> ± 1.167 x 10 <sup>-9</sup>  | 7.738 x 10 <sup>-10</sup> ± 9.417 x 10 <sup>-10</sup> | 8.467 x 10 <sup>-10</sup> ± 9.783 x 10 <sup>-10</sup> | 1.344 x 10 <sup>-9</sup> ± 1.536 x 10 <sup>-9</sup>   | 0.690           |
| Cholesterol in extra-large VLDL        | 0.0309 ± 0.022                                        | 0.019 ± 0.023                                         | 0.015 ± 0.018                                         | 0.017 ± 0.019                                         | 0.026 ± 0.030                                         | 0.845           |
| TG in extra-large VLDL                 | 0.096 ± 0.0689                                        | 0.059 ± 0.071                                         | 0.048 ± 0.058                                         | 0.0518 ± 0.060                                        | 0.083 ± 0.095                                         | 0.648           |
| <b>Extra-extra-large VLDL particle</b> | 3.321 x 10 <sup>-10</sup> ± 2.062 x 10 <sup>-10</sup> | 2.033 x 10 <sup>-10</sup> ± 2.521 x 10 <sup>-10</sup> | 1.607 x 10 <sup>-10</sup> ± 1.892 x 10 <sup>-10</sup> | 1.783 x 10 <sup>-10</sup> ± 1.945 x 10 <sup>-10</sup> | 2.665 x 10 <sup>-10</sup> ± 2.973 x 10 <sup>-10</sup> | 0.704           |
| Cholesterol in extra-extra-large VLDL  | 0.012 ± 0.008                                         | 0.007 ± 0.008                                         | 0.0058 ± 0.0066                                       | 0.007 ± 0.007                                         | 0.010 ± 0.011                                         | 0.944           |
| TG in extra-extra-large VLDL           | 0.050 ± 0.031                                         | 0.031 ± 0.038                                         | 0.024 ± 0.029                                         | 0.027 ± 0.029                                         | 0.040 ± 0.045                                         | 0.677           |

Quantitative variables are expressed as means ± standard deviations. The *p* value was adjusted by age, sex and BMI.
